# Supplementary material for: Co-precipitation with calcium carbonate – a fast and nontoxic method for removal of nanopollutants from water?
Source: Royal Society of Chemistry journal article supplement (doi:10.1039/c4ra14292f), 2015-01-01
Supplement: c4ra14292f1.pdf [file c4ra14292f1.pdf]

## Supporting information

### *Co-precipitation with calcium carbonate – A fast and nontoxic method for removal of nanopollutants from water?*

*Ramakrishna Mallampati and Suresh Valiyaveetil\**

*Department of Chemistry, National University of Singapore, Singapore 117543*

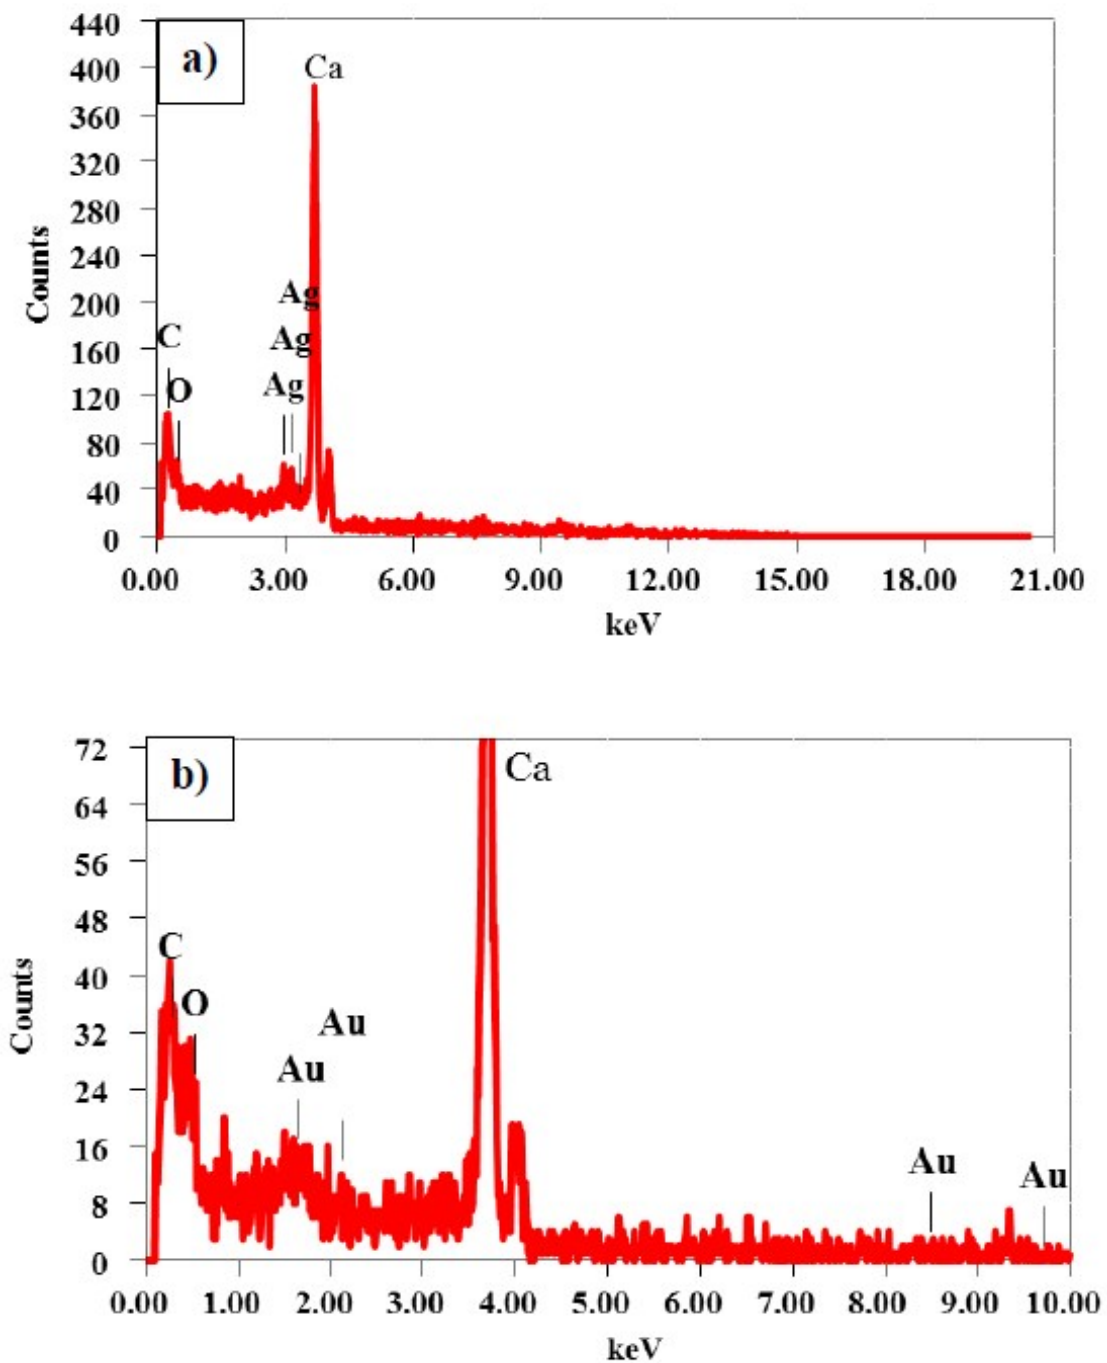

Figure S1. EDS analysis of Ag (a) and Au (b) bonded  $\text{CaCO}_3$  precipitate

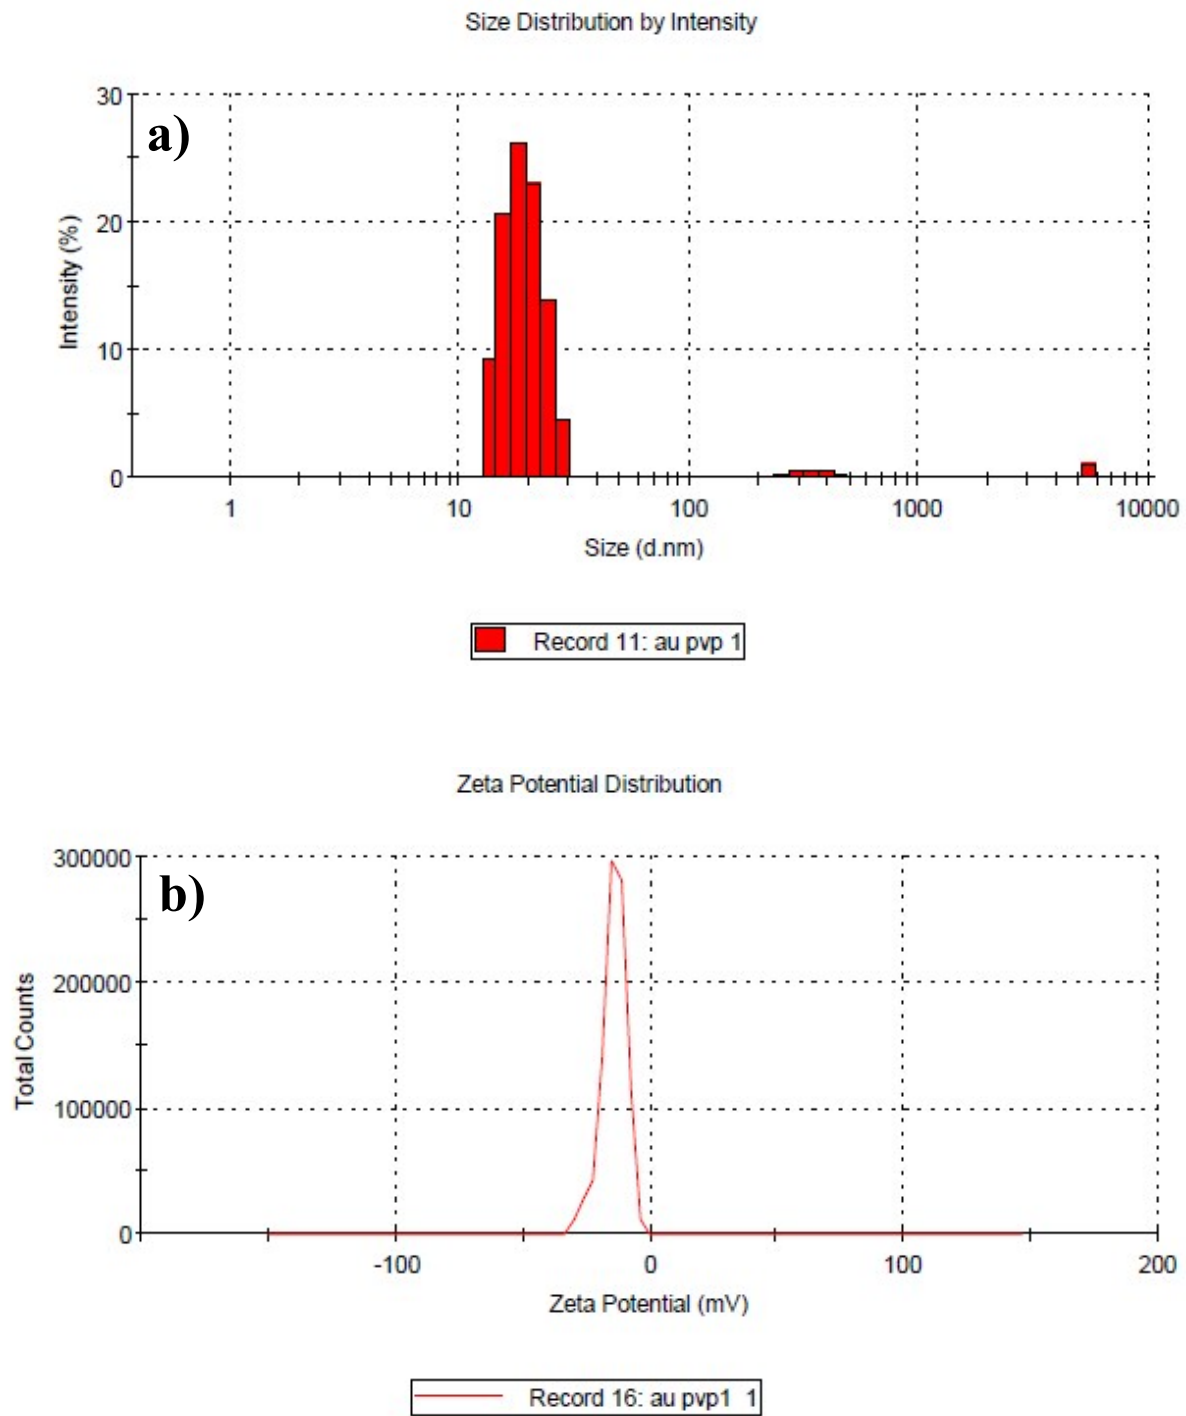

Figure S2. Size distribution (a) and zeta potential (b) plots of Au PVP NPs.

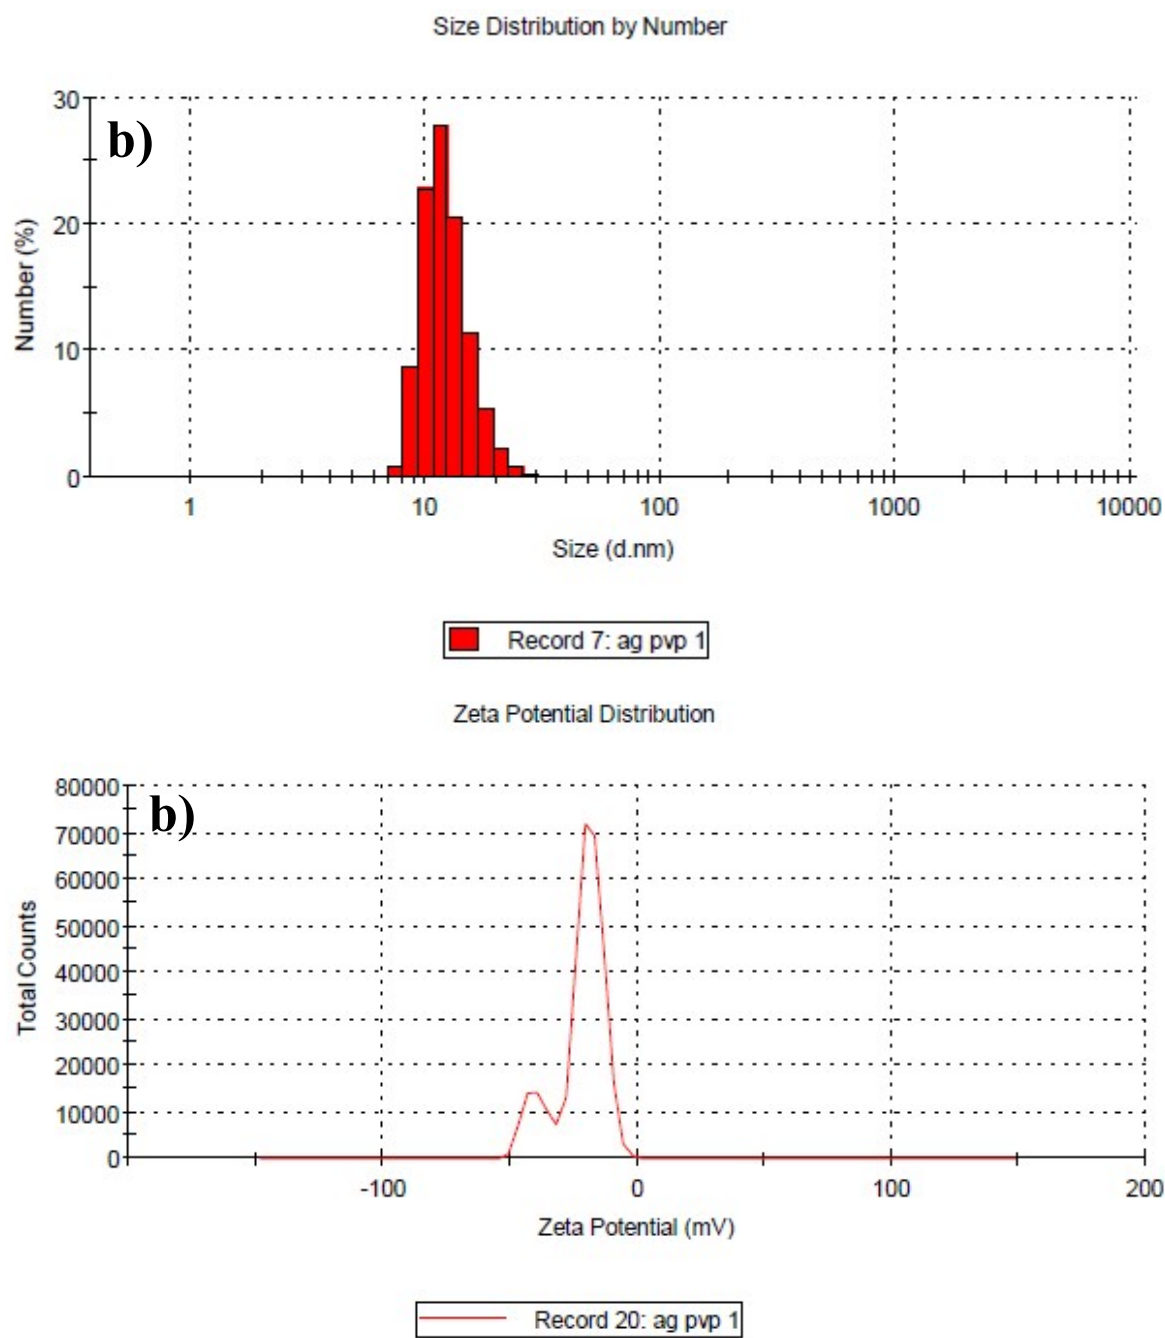

Figure S3. Size distribution (a) and zeta potential (b) plots of Ag PVP NPs.

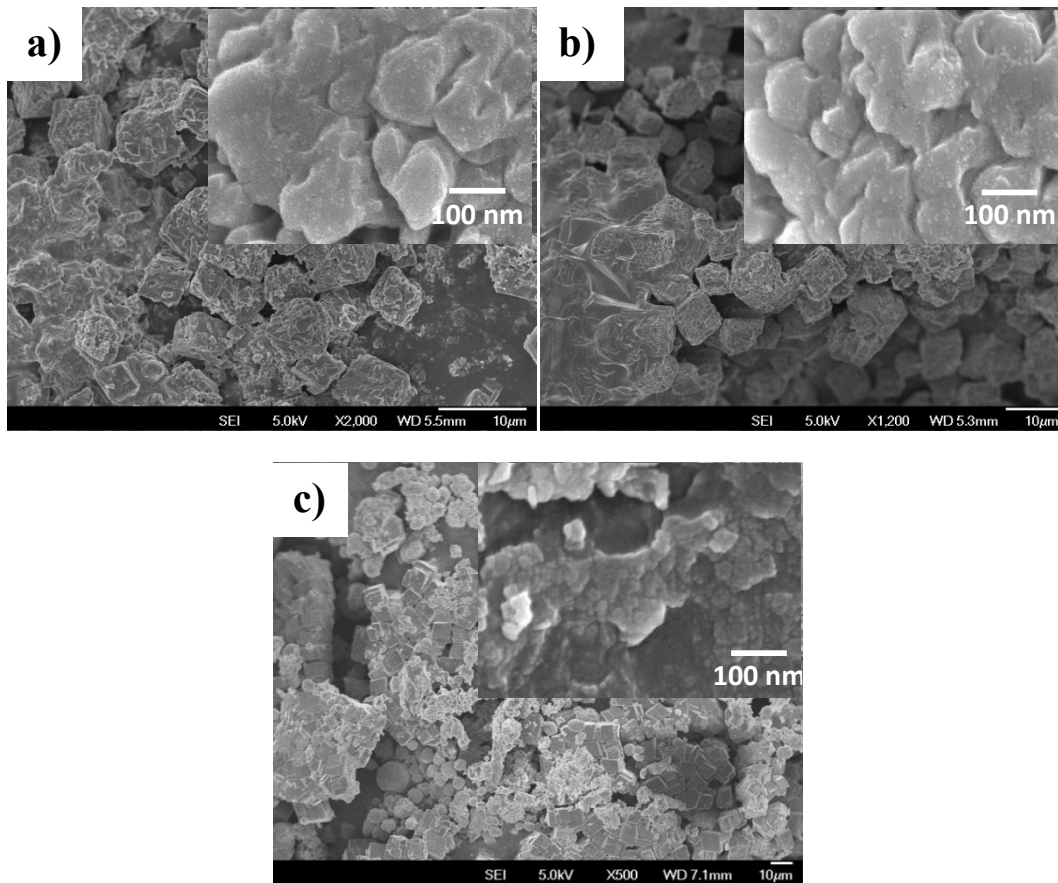

Figure S4. FESEM images of Ag NMs (a), Au NMs (b) and GO (c) adsorbed on CaCO<sub>3</sub> precipitate (inset shows magnified high resolution image).
